# Supplementary material for: Marker-trait associations and genomic predictions of interspecific pear (Pyrus) fruit characteristics
Source: PubMed Central journal article supplement (PMC6588632; doi:10.1038/s41598-019-45618-w), 2019-06-21
Supplement: 41598_2019_45618_MOESM1_ESM.pdf [file 41598_2019_45618_MOESM1_ESM.pdf]

## **Supplementary Information**

### **Marker-trait associations and genomic predictions of interspecific pear (*Pyrus*) fruit characteristics**

Satish Kumar<sup>1\*</sup>, Chris Kirk<sup>2</sup>, Cecilia Hong Deng<sup>3</sup>, Angela Shirtliff<sup>5</sup>, Claudia Wiedow<sup>2</sup>, Mengfan Qin<sup>4</sup>, Jun Wu<sup>4</sup>, Lester Brewer<sup>5</sup>

<sup>1</sup>The New Zealand Institute for Plant and Food Research Limited, Hawke's Bay Research Centre, Havelock North, New Zealand.

<sup>2</sup>The New Zealand Institute for Plant and Food Research Limited, Palmerston North Research Centre, Palmerston North, New Zealand.

<sup>3</sup>The New Zealand Institute for Plant and Food Research Limited, Mount Albert Research Centre, Auckland, New Zealand.

<sup>4</sup>Centre of Pear Engineering Technology Research, Nanjing Agricultural University, Nanjing 210095, China

<sup>5</sup>The New Zealand Institute for Plant and Food Research Limited, Motueka Research Centre, Motueka, New Zealand.

\*Corresponding author:

Satish Kumar: [satish.kumar@plantandfood.co.nz](mailto:satish.kumar@plantandfood.co.nz)

### **Supplementary Figures S1- S4**

### **Supplementary Table S1**

**Supplementary Fig. S1.** Distribution of various pear fruit quality traits (firmness: FIRM; crispness: CRIS; juiciness: JUIC; sweetness: SWET; sourness: SOUR; flavour intensity: FINT; fruit scuffing: SCUF; shape: SHAP; russet: RUSS; fruit weight: AVFW).

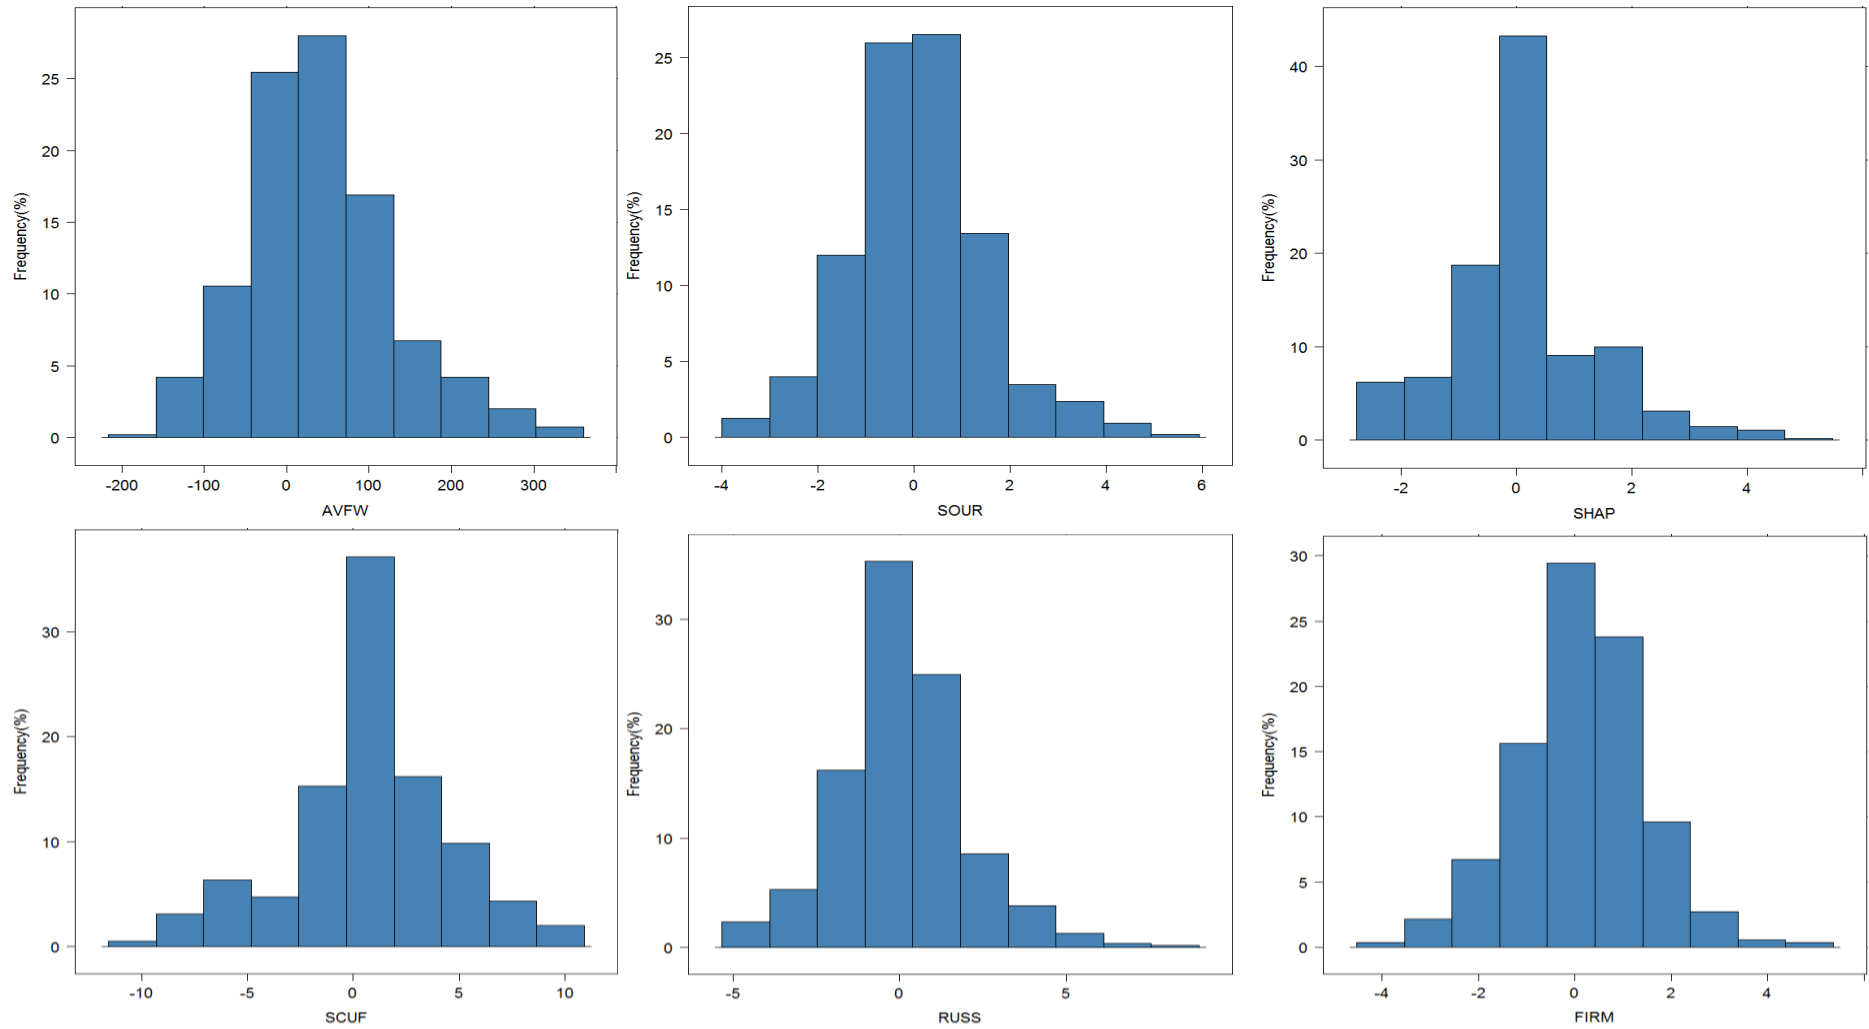

Supplementary Fig. S1 (continued)

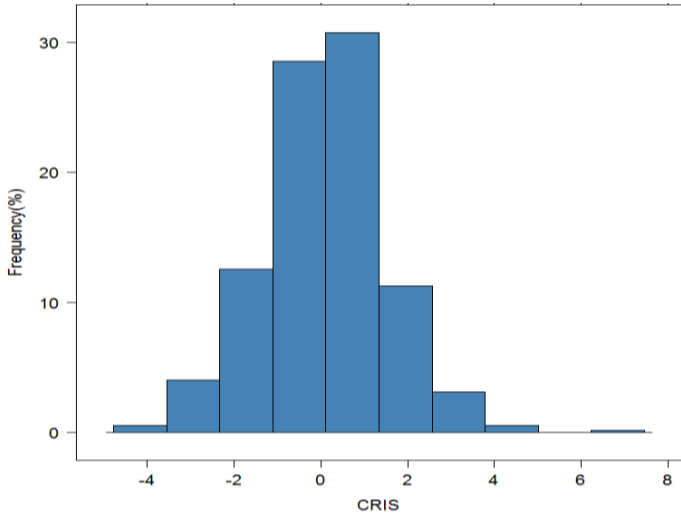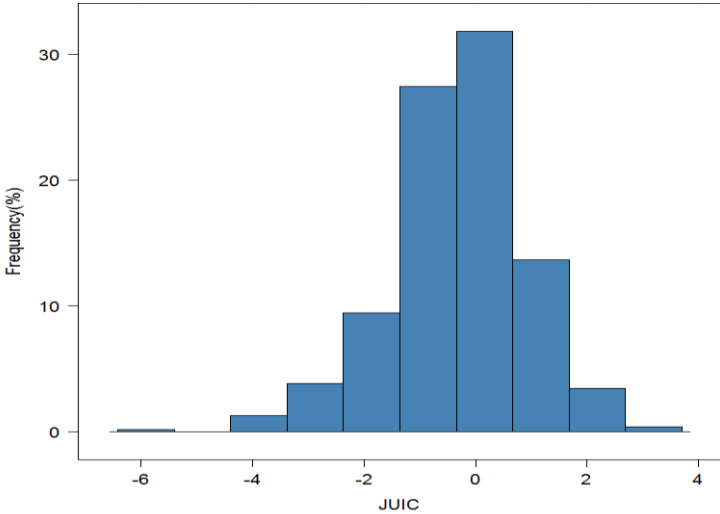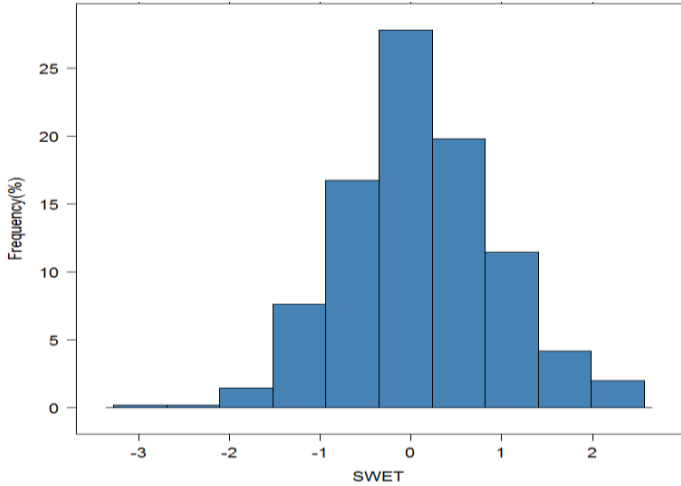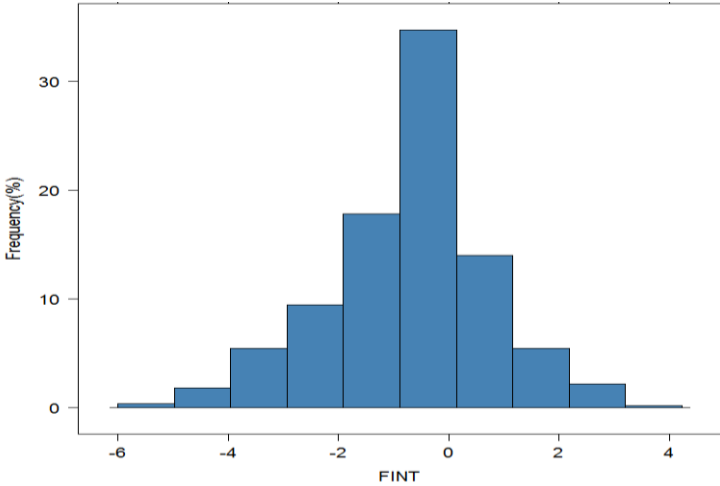

**Supplementary Fig. S2.** Effect size (proportion of phenotypic variance explained) of genome-wide SNPs for various pear fruit quality phenotypes (firmness: FIRM; crispness: CRIS; juiciness: JUIC; sweetness: SWET; sourness: SOUR; flavour intensity: FINT; fruit scuffing: SCUF; shape: SHAP; russet: RUSS; fruit weight: AVFW).

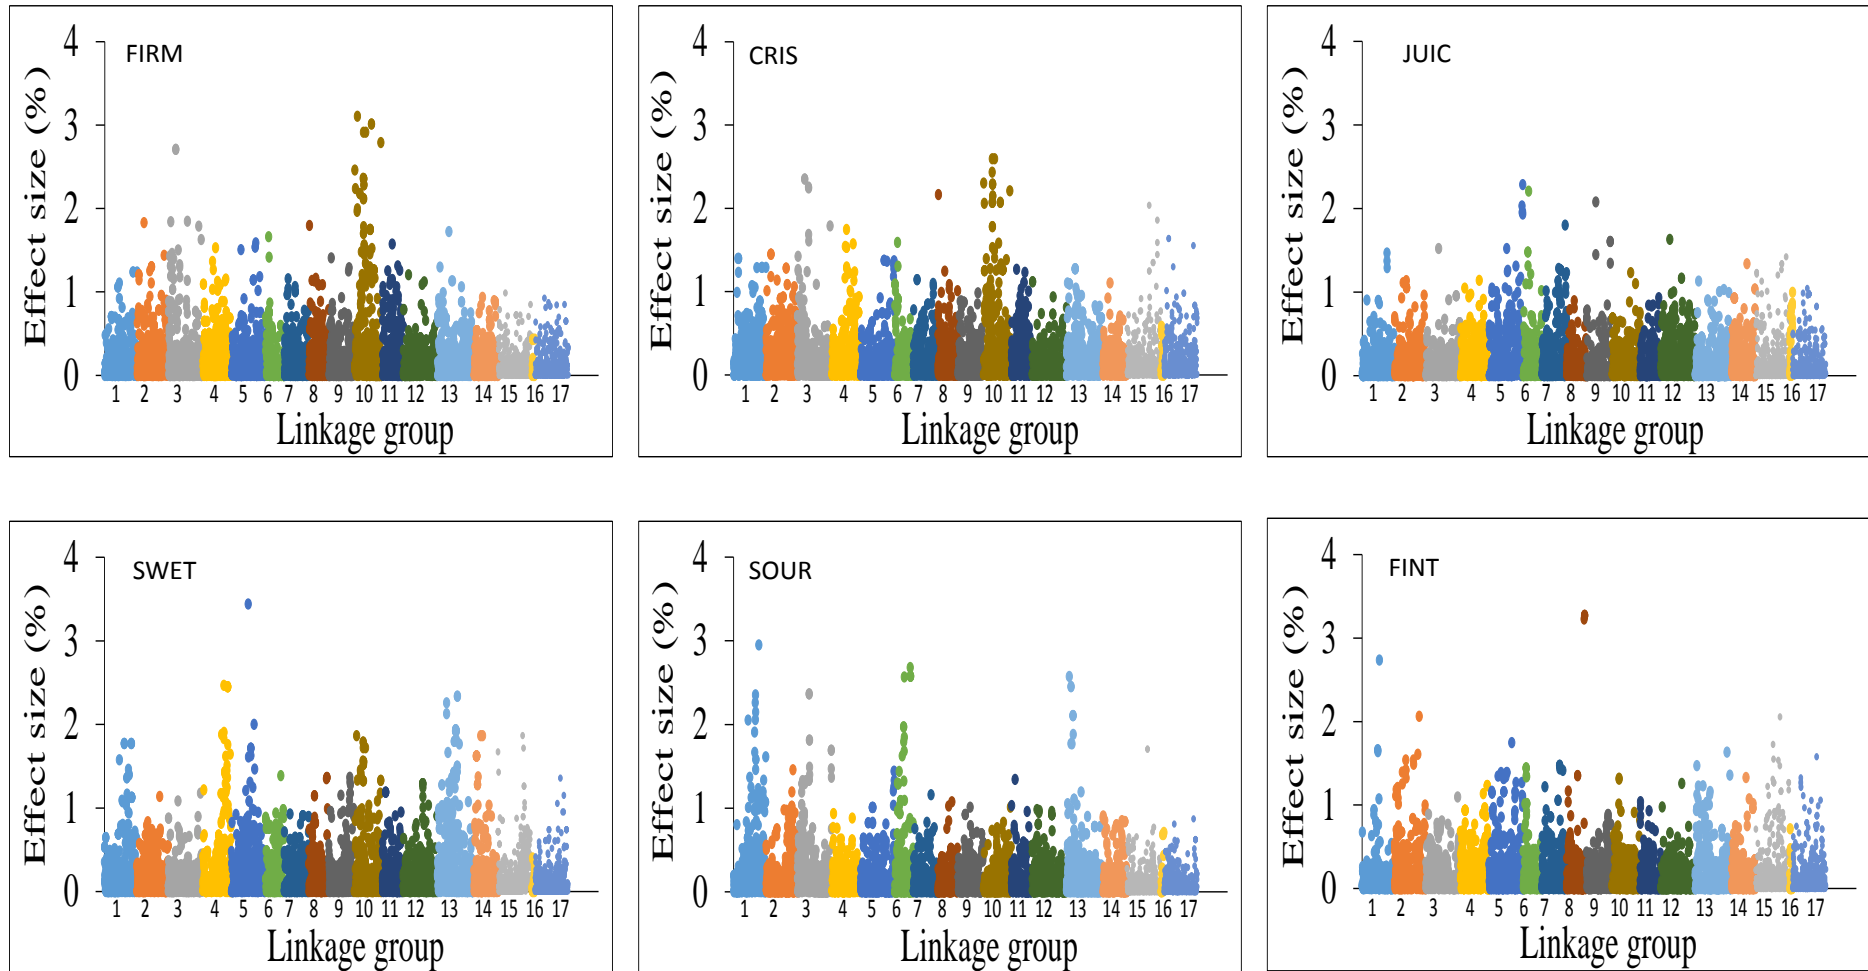

Supplementary Fig. S2 (continued)

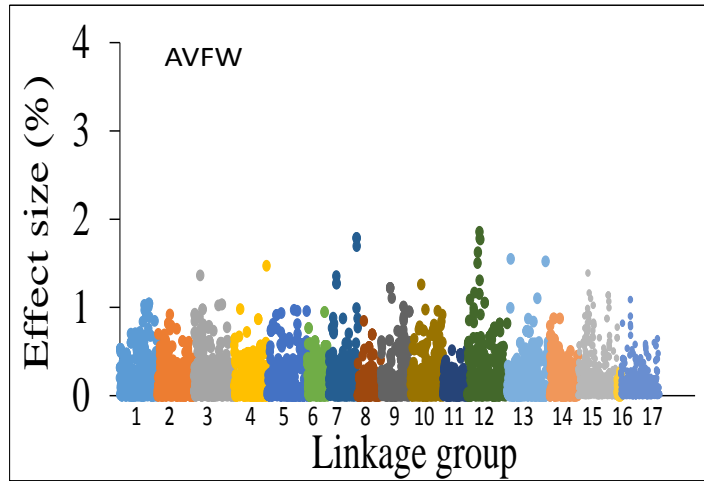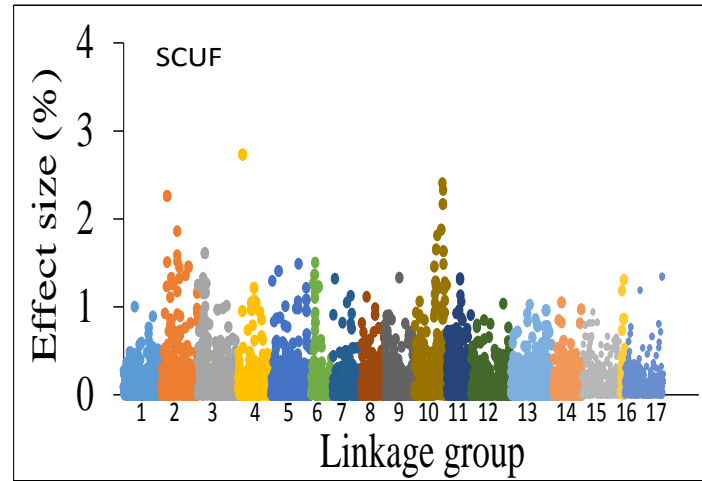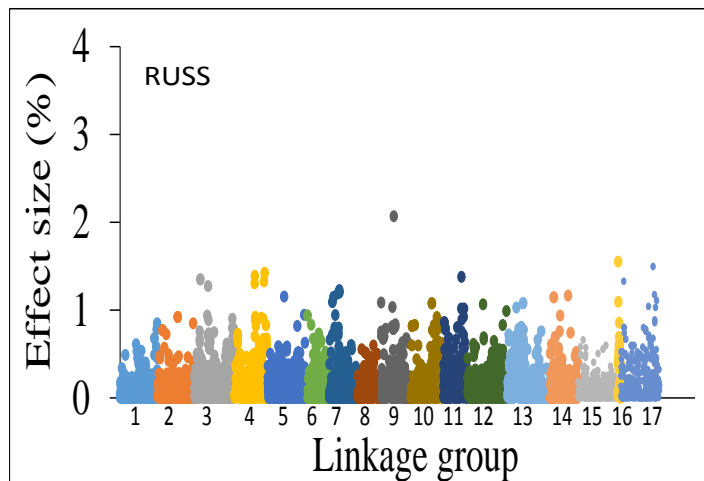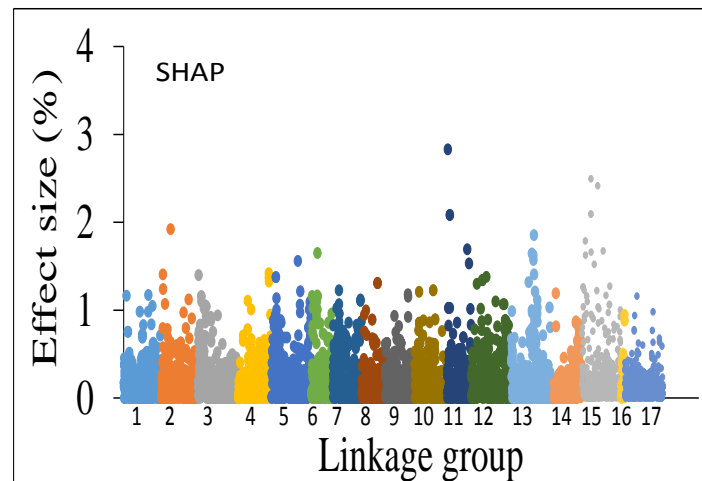

**Supplementary Fig. S3.** Manhattan plots of the  $-\log_{10}(p)$  values (y-axis) for various pear fruit traits (firmness: FIRM; crispness: CRIS; juiciness: JUIC; sweetness: SWET; sourness: SOUR; flavour intensity: FINT; fruit scuffing: SCUF; shape: SHAP; russet: RUSS; fruit weight: AVFW) from a genome-wide scan (using multiple SNPs as fixed co-factors; **MLMM**) are plotted against position on each of 17 linkage groups (x-axis). Blue horizontal line indicates the significance threshold  $p < 0.001$ .

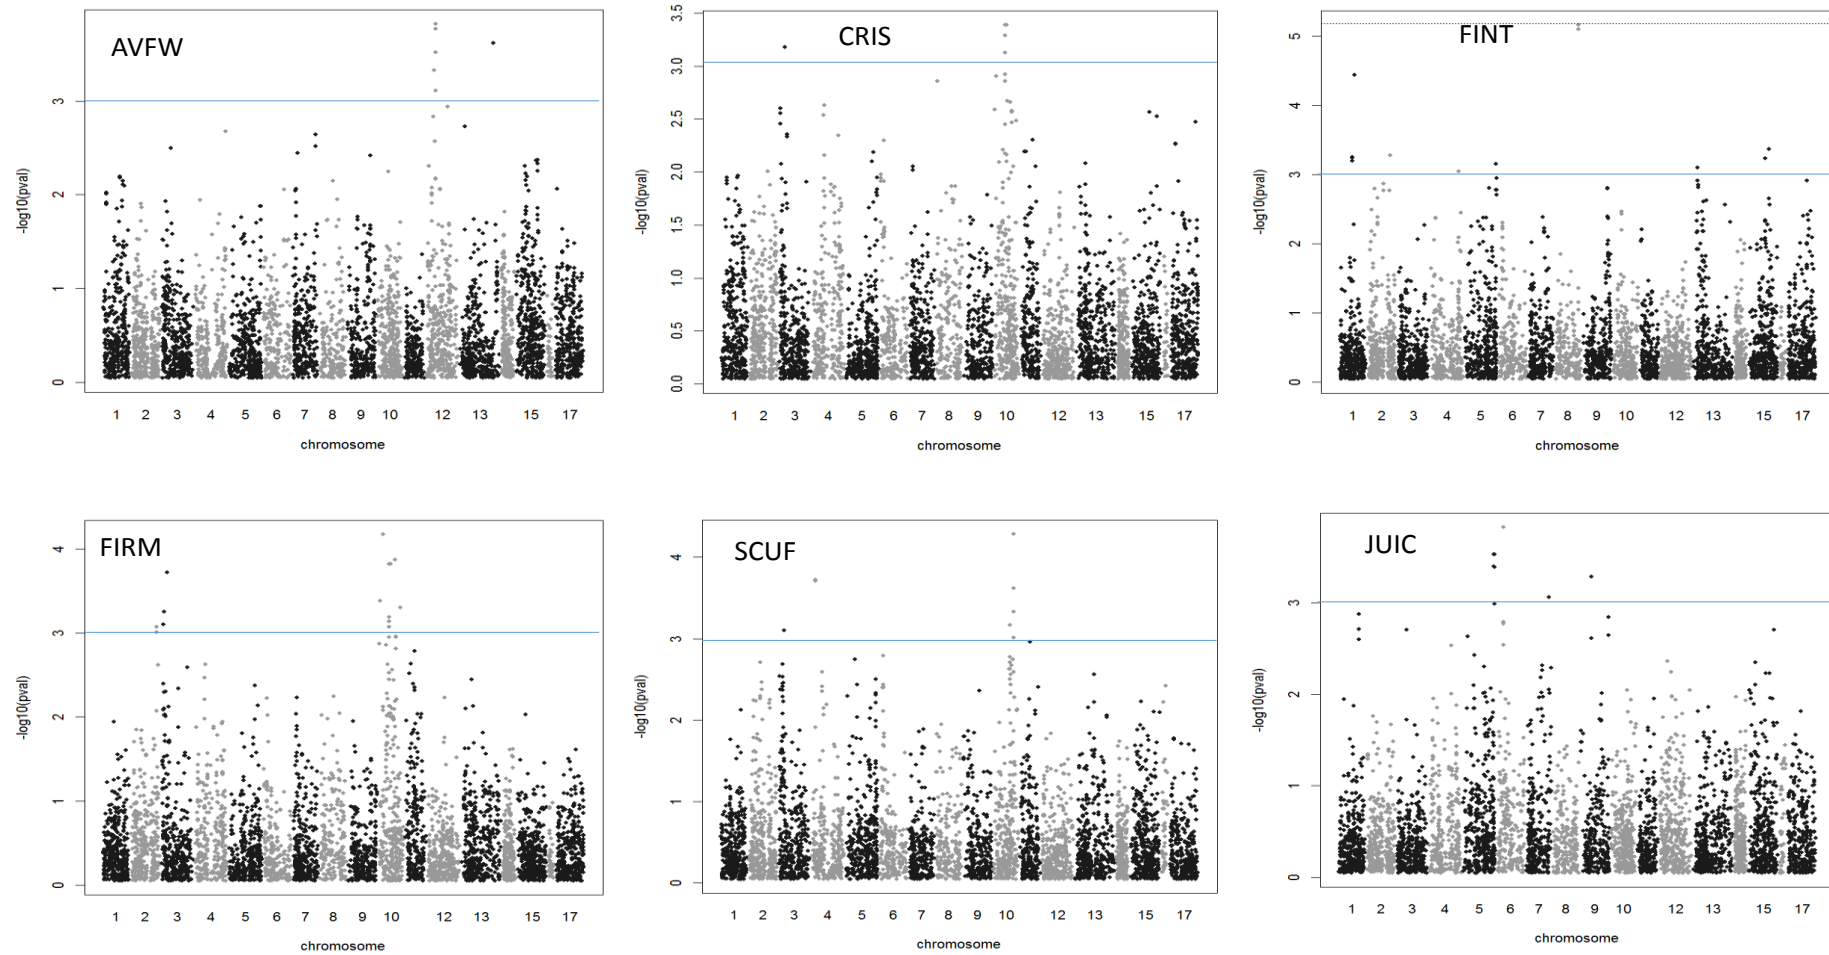

Supplementary Fig. S3 (continued)

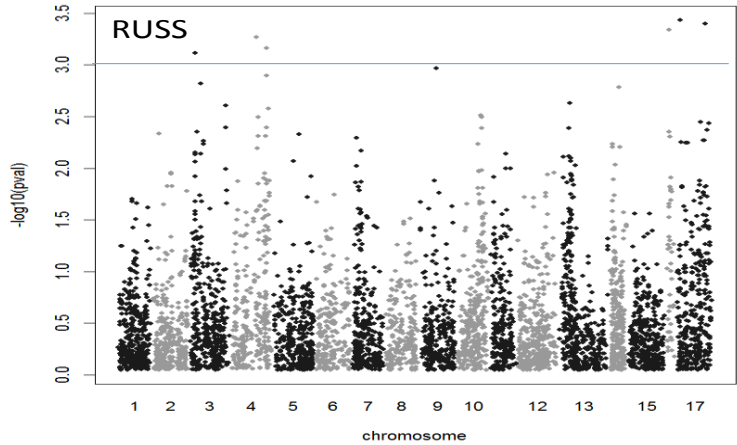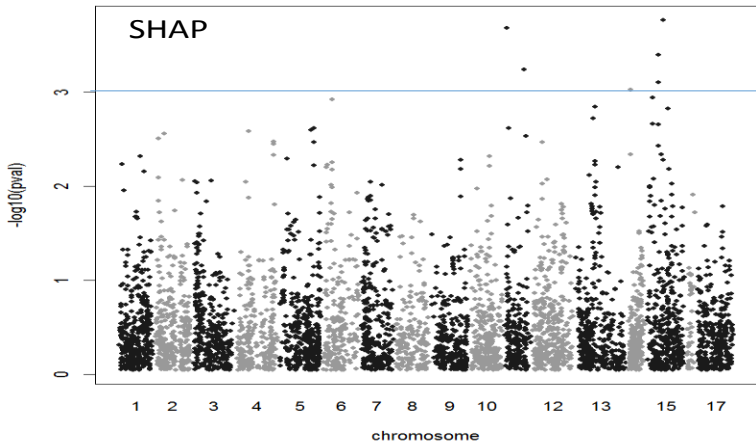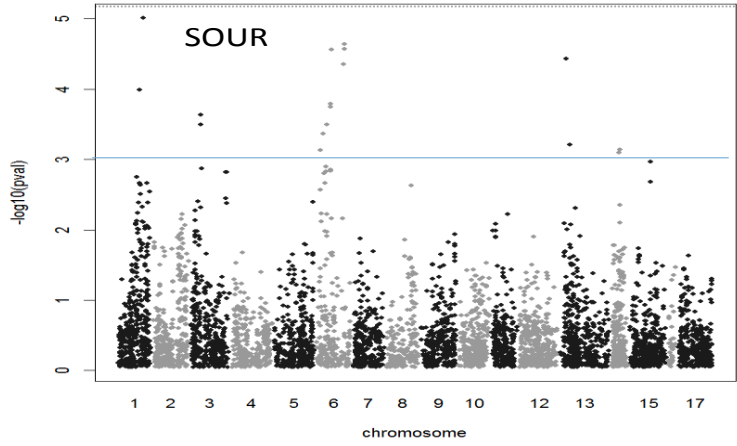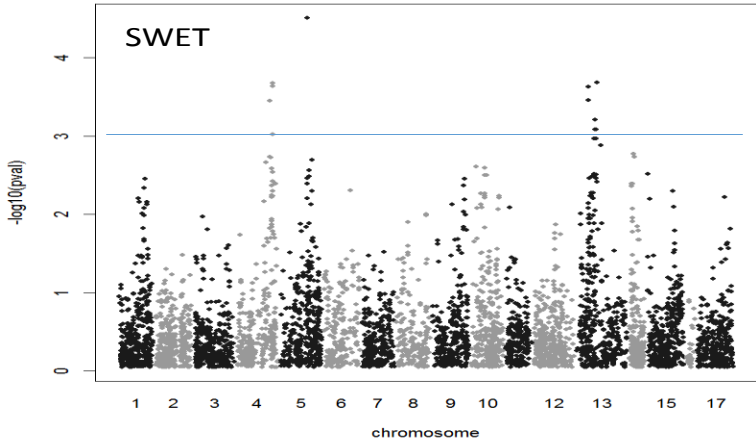

**Supplementary Fig. S4.** Manhattan plots of the  $-\log_{10}(p)$  values (y-axis) for various pear fruit traits (firmness: FIRM; crispness: CRIS; juiciness: JUIC; sweetness: SWET; sourness: SOUR; flavour intensity: FINT; fruit scuffing: SCUF; shape: SHAP; russet: RUSS; fruit weight: AVFW) from a genome-wide scan (using multi-locus random model; **MRMLM**) are plotted against position on each of 17 linkage groups (x-axis). Blue horizontal line indicates the significance threshold  $p < 0.001$ .

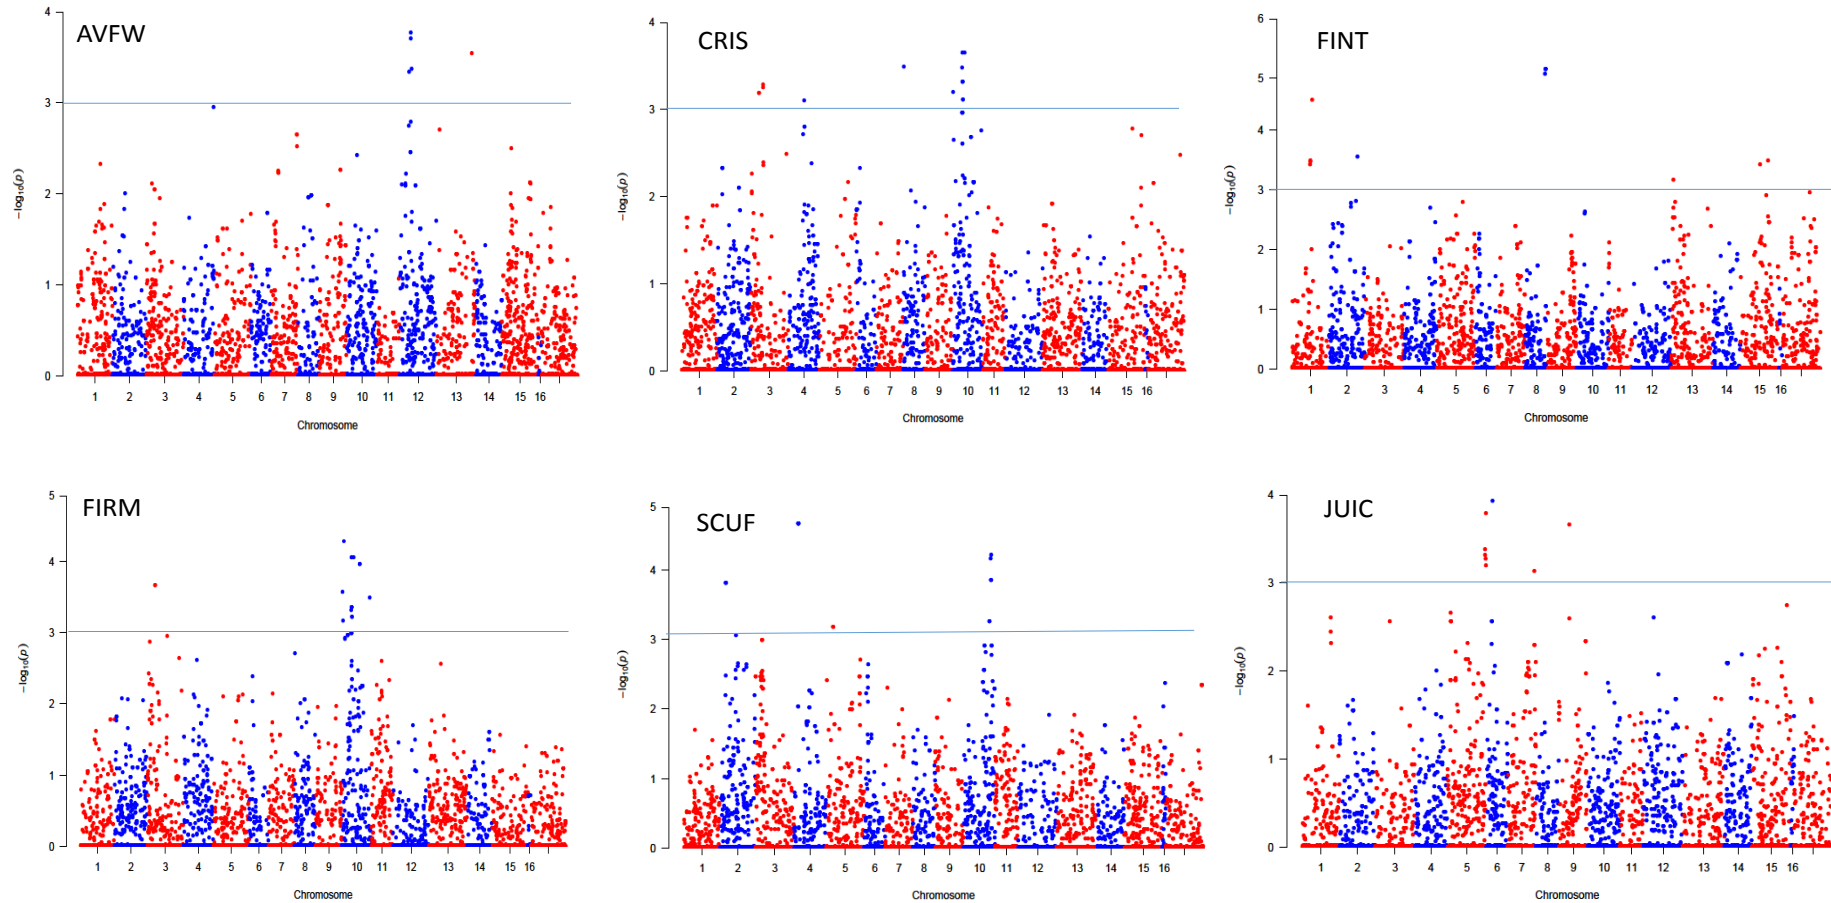



Supplementary Fig. S4 (continued)

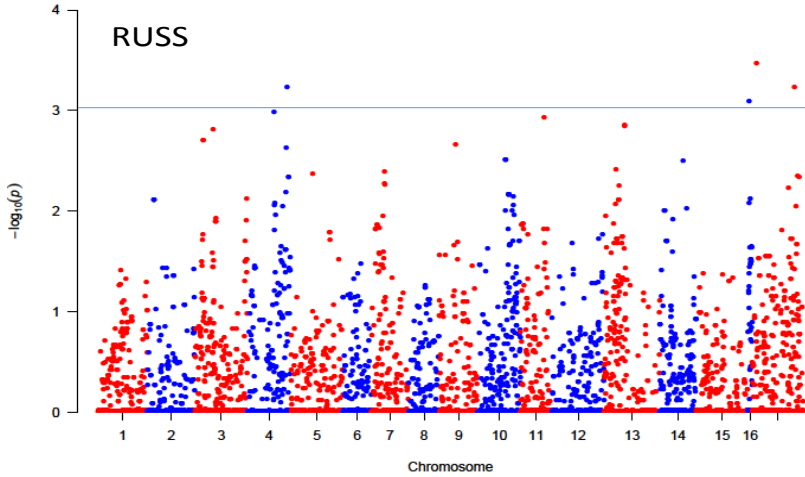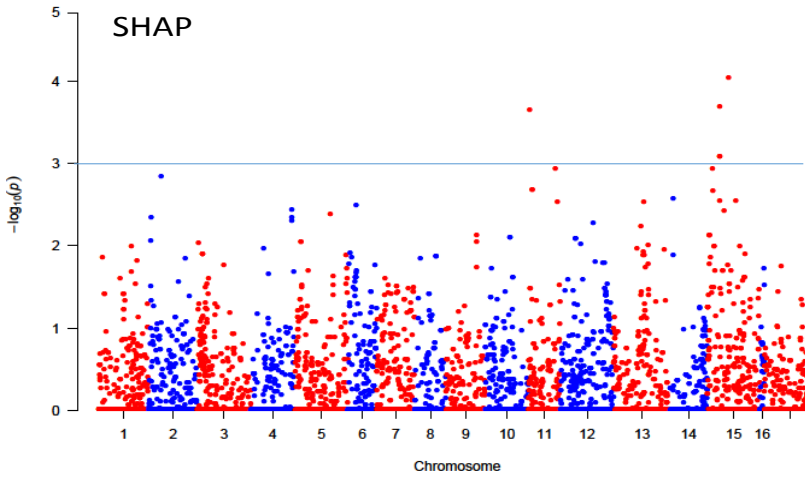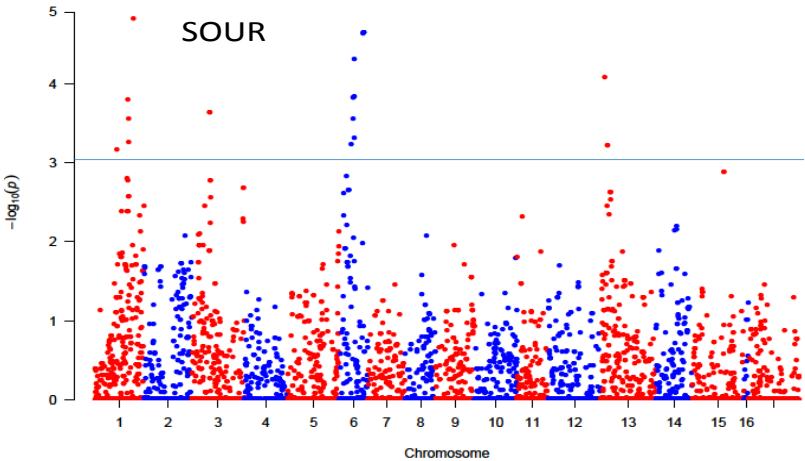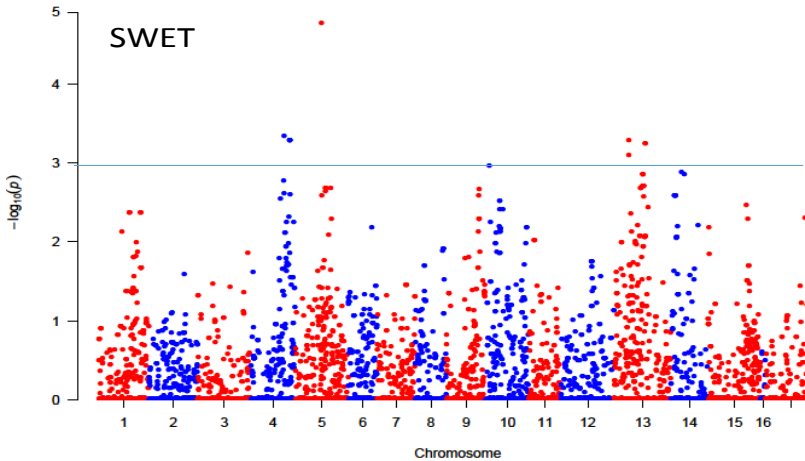

**Supplementary Table S1. Significant SNPs detected by single-locus (GAPIT: Lipka et al. 2012) and multi-locus (MLMM: Segura et al. 2012; MRMLM: Wang et al. 2016) GWAS in interspecific pear population.**

| Trait       | Method             | SNP_ID      | Linkage group | Position (cM)    | -Log <sub>10</sub> p | Minor allele frequency |
|-------------|--------------------|-------------|---------------|------------------|----------------------|------------------------|
| AVFW        | GAPIT              | S90377_61   | 7             | 210.9            | 3.11                 | 0.18                   |
|             | MLMM               | S340_157440 | 12            | 80.04            | 3.14                 | 0.14                   |
|             | MLMM, MRMLM        | S340_157444 | 12            | 65.41            | 3.32, 3.34           | 0.34                   |
|             |                    | S281_132812 | 13            | 305.22           | 3.62, 3.55           | 0.35                   |
|             | GAPIT, MLMM, MRMLM | S340_202551 | 12            | 79.42            | 3.25, 3.82, 3.77     | 0.11                   |
|             |                    | S340_157122 | 12            | 79.74            | 3.13, 3.76, 3.70     | 0.11                   |
| S77_264162  |                    | 12          | 81.43         | 3.12, 3.52, 3.37 | 0.33                 |                        |
| CRIS        | GAPIT              | S587_89961  | 10            | 201.31           | 3.18                 | 0.49                   |
|             | MRMLM              | S488_142340 | 4             | 111.87           | 3.11                 | 0.07                   |
|             | GAPIT, MRMLM       | S136_172548 | 3             | 67.59            | 3.23, 3.25           | 0.13                   |
|             |                    | S527_123054 | 8             | 9.32             | 3.12, 3.49           | 0.2                    |
|             |                    | S278_9677   | 10            | 2.55             | 3.29, 3.20           | 0.24                   |
|             |                    | S295_219431 | 10            | 97.22            | 3.10, 3.11           | 0.19                   |
|             | GAPIT, MLMM, MRMLM | S764_78213  | 10            | 95.6             | 3.64, 3.39, 3.65     | 0.2                    |
|             |                    | S961_23735  | 10            | 94.83            | 3.45, 3.29, 3.49     | 0.2                    |
|             |                    | S295_219507 | 10            | 96.55            | 3.27, 3.12, 3.32     | 0.19                   |
|             |                    | S1220_32314 | 3             | 46.33            | 3.35, 3.18, 3.19     | 0.41                   |
| FINT        | MLMM               | S330_62686  | 4             | 251.68           | 3.04                 | 0.1                    |
|             |                    | S210_30068  | 5             | 288.39           | 3.15                 | 0.18                   |
|             | MLMM, MRMLM        | S179_136748 | 1             | 117.22           | 3.25, 3.48           | 0.16                   |
|             |                    | S89_228187  | 15            | 143.03           | 3.23, 3.43           | 0.3                    |
|             |                    | S191_90827  | 13            | 33.61            | 3.10, 3.17           | 0.09                   |
|             | GAPIT, MLMM, MRMLM | S203_236962 | 8             | 214.2            | 4.63, 5.16, 5.15     | 0.37                   |
|             |                    | S203_236958 | 8             | 211.56           | 4.59, 5.10, 5.08     | 0.36                   |
|             |                    | S94571_573  | 1             | 133.11           | 3.98, 4.44, 4.65     | 0.25                   |
| S301_152577 |                    | 2           | 205.11        | 3.13, 3.28, 3.55 | 0.13                 |                        |
| S118_262042 |                    | 15          | 180.89        | 3.12, 3.37, 3.49 | 0.11                 |                        |
| FIRM        | MLMM               | S7274_227   | 2             | 234.86           | 3.07                 | 0.11                   |
|             |                    | S23_486843  | 3             | 16.39            | 3.1                  | 0.13                   |
|             |                    | S744_151224 | 3             | 18.47            | 3.26                 | 0.17                   |
|             | MLMM, MRMLM        | S278_9677   | 10            | 2.55             | 3.46, 3.57           | 0.24                   |
|             | GAPIT, MLMM, MRMLM | S1220_32314 | 3             | 46.33            | 3.76, 3.72, 3.66     | 0.41                   |
|             |                    | S57756_421  | 10            | 11.18            | 3.20, 3.38, 3.17     | 0.44                   |
|             |                    | S41732_123  | 10            | 38.74            | 4.22, 4.18, 4.36     | 0.17                   |
|             |                    | S961_23735  | 10            | 94.83            | 3.34, 3.13, 3.32     | 0.2                    |
|             |                    | S764_78213  | 10            | 95.6             | 4.00, 3.82, 4.05     | 0.2                    |
|             |                    | S295_219507 | 10            | 96.55            | 3.34, 3.19, 3.35     | 0.19                   |
|             |                    | S295_219431 | 10            | 97.22            | 3.25, 3.07, 3.22     | 0.19                   |
|             |                    | S18_341916  | 10            | 147.99           | 4.12, 3.87, 3.96     | 0.16                   |
|             |                    | S587_89961  | 10            | 201.31           | 3.85, 3.30, 3.49     | 0.49                   |

**Supplementary Table S1** (continued)

| Trait       | Method             | SNP_ID      | Linkage group    | Position (cM)    | LOD score        | Minor allele frequency |
|-------------|--------------------|-------------|------------------|------------------|------------------|------------------------|
| SCUF        | GAPIT              | S519_133592 | 10               | 157.79           | 3.05             | 0.09                   |
|             | MLMM               | S2868_13888 | 10               | 153.21           | 3.16             | 0.2                    |
|             |                    | S99_326430  | 3                | 46.33            | 3.1              | 0.41                   |
|             | MRMLM              | S27_149532  | 5                | 85.27            | 3.18             | 0.41                   |
|             | GAPIT, MRMLM       | S1378_62536 | 2                | 40.44            | 3.68, 3.81       | 0.1                    |
|             |                    | S929_92875  | 2                | 106              | 3.12, 3.05       | 0.1                    |
|             |                    | S1142_25488 | 10               | 178.53           | 3.14, 3.26       | 0.1                    |
|             | GAPIT, MLMM, MRMLM | S29076_1553 | 10               | 184.92           | 3.88, 4.28, 4.16 | 0.2                    |
|             |                    | S1050_20712 | 10               | 188.59           | 3.77, 3.62, 4.22 | 0.1                    |
|             |                    | S2275_1644  | 10               | 188.63           | 3.55, 3.33, 3.86 | 0.08                   |
| S128_2463   |                    | 4           | 29.6             | 4.33, 3.72, 4.77 | 0.11             |                        |
| JUIC        | GAPIT, MRMLM       | S210_30053  | 5                | 289.97           | 3.54, 3.79       | 0.18                   |
|             | GAPIT, MRMLM       | S210_30058  | 5                | 289.58           | 3.11, 3.28       | 0.19                   |
|             | MLMM, MRMLM        | S2536_21208 | 7                | 208.6            | 3.05, 3.14       | 0.14                   |
|             | GAPIT, MLMM, MRMLM | S210_30038  | 5                | 288.39           | 3.21, 3.53, 3.32 | 0.18                   |
|             |                    | S210_30069  | 5                | 289.97           | 3.54, 3.53, 3.20 | 0.18                   |
|             |                    | S25_140518  | 6                | 60.61            | 3.44, 3.82, 3.92 | 0.4                    |
| S90462_626  | 9                  | 97.83       | 3.27, 3.28, 3.67 | 0.06             |                  |                        |
| RUSS        | GAPIT              | S150_272459 | 9                | 123.17           | 3.77             | 0.36                   |
|             | MLMM               | S99_370238  | 3                | 32.83            | 3.12             | 0.22                   |
|             |                    | S839_1081   | 4                | 185.96           | 3.27             | 0.44                   |
|             | MLMM, MRMLM        | S2558_15304 | 4                | 262.4            | 3.16, 3.23       | 0.36                   |
|             |                    | S1383_61402 | 16               | 12.23            | 3.34, 3.10       | 0.37                   |
|             |                    | S213_255719 | 17               | 19.38            | 3.43, 3.47       | 0.46                   |
| S63_393328  | 17                 | 210.12      | 3.40, 3.24       | 0.35             |                  |                        |
| SHAP        | GAPIT              | S4855_830   | 11               | 26.23            | 3.24             | 0.17                   |
|             | MLMM               | S64_173643  | 11               | 142.77           | 3.24             | 0.37                   |
|             | GAPIT, MLMM, MRMLM | S4855_850   | 11               | 16.65            | 4.21, 3.69, 3.65 | 0.16                   |
|             |                    | S31850_361  | 15               | 79.98            | 3.77, 3.40, 3.69 | 0.08                   |
|             |                    | S31850_365  | 15               | 79.98            | 3.25, 3.11, 3.09 | 0.08                   |
| S13375_2092 | 15                 | 115.1       | 3.67, 3.77, 4.04 | 0.3              |                  |                        |
| SWET        | MLMM               | S19_193115  | 13               | 130.74           | 3.2              | 0.32                   |
|             |                    | S19_193117  | 13               | 136.64           | 3.08             | 0.34                   |
|             | MLMM, MRMLM        | S3_522074   | 13               | 82.64            | 3.46, 3.10       | 0.34                   |
|             | GAPIT, MLMM, MRMLM | S161_122829 | 4                | 239.02           | 3.35, 3.45, 3.35 | 0.25                   |
|             |                    | S673_155500 | 4                | 257.34           | 3.33, 3.67, 3.29 | 0.3                    |
|             |                    | S673_155490 | 4                | 257.59           | 3.33, 3.64, 3.29 | 0.3                    |
|             |                    | S182_250115 | 5                | 189.89           | 4.45, 4.51, 4.87 | 0.21                   |
|             |                    | S3_522046   | 13               | 82.81            | 3.11, 3.63, 3.28 | 0.34                   |
|             |                    | S3_522033   | 13               | 145.18           | 3.20, 3.68, 3.25 | 0.5                    |

**Supplementary Table S1** (continued)

| Trait | Method             | SNP_ID      | Linkage group | Position (cM) | LOD score        | Minor allele frequency |
|-------|--------------------|-------------|---------------|---------------|------------------|------------------------|
| SOUR  | GAPIT              | S19231_632  | 1             | 150.03        | 3.05             | 0.22                   |
|       |                    | S73_183403  | 1             | 159.29        | 3.25             | 0.12                   |
|       | MLMM               | S3104_13218 | 3             | 74.11         | 3.63             | 0.41                   |
|       |                    | S48_62828   | 6             | 29.4          | 3.13             | 0.25                   |
|       |                    | S302_12660  | 6             | 50.36         | 3.36             | 0.48                   |
|       |                    | S719_37113  | 14            | 59.15         | 3.14             | 0.39                   |
|       |                    | S5000_3120  | 14            | 53.96         | 3.09             | 0.4                    |
|       | MRMLM              | S2349_45490 | 1             | 163.25        | 3.26             | 0.19                   |
|       | MLMM, MRMLM        | S1587_73096 | 3             | 70.36         | 3.49, 3.64       | 0.35                   |
|       |                    | S235_63703  | 6             | 78.45         | 3.50, 3.24       | 0.06                   |
|       |                    | S1352_60946 | 6             | 106.05        | 3.79, 3.84       | 0.06                   |
|       |                    | S1627_56897 | 6             | 105.2         | 3.75, 3.31       | 0.42                   |
|       | GAPIT, MLMM        | S2096_36898 | 13            | 69.91         | 3.31, 3.21       | 0.2                    |
|       | GAPIT, MRMLM       | S1430_17611 | 13            | 55.53         | 3.77, 3.22       | 0.12                   |
|       |                    | S377_162286 | 1             | 108.18        | 3.24, 3.17       | 0.16                   |
|       |                    | S2349_45611 | 1             | 163.25        | 3.37, 3.56       | 0.19                   |
|       |                    | S801_5472   | 6             | 102.16        | 3.13, 3.82       | 0.07                   |
|       | GAPIT, MLMM, MRMLM | S73_183414  | 1             | 158.78        | 3.52, 3.98, 3.79 | 0.32                   |
|       |                    | S465_110990 | 1             | 187.4         | 4.42, 5.01, 4.92 | 0.33                   |
|       |                    | S1402_39914 | 6             | 109.94        | 3.92, 4.56, 4.41 | 0.49                   |
|       |                    | S41216_512  | 6             | 201.79        | 4.06, 4.35, 4.73 | 0.07                   |
|       |                    | S499_187425 | 6             | 208.68        | 3.93, 4.64, 4.73 | 0.07                   |
|       |                    | S409_219105 | 13            | 41.35         | 3.93, 4.43, 4.08 | 0.45                   |
